# Supplementary material for: Multimodal single-cell analysis of nonrandom heteroplasmy distribution in human retinal mitochondrial disease
Source: JCI journal article supplement (doi:10.1172/jci.insight.165937), 2023-06-08
Supplement: sd1 [file 1]

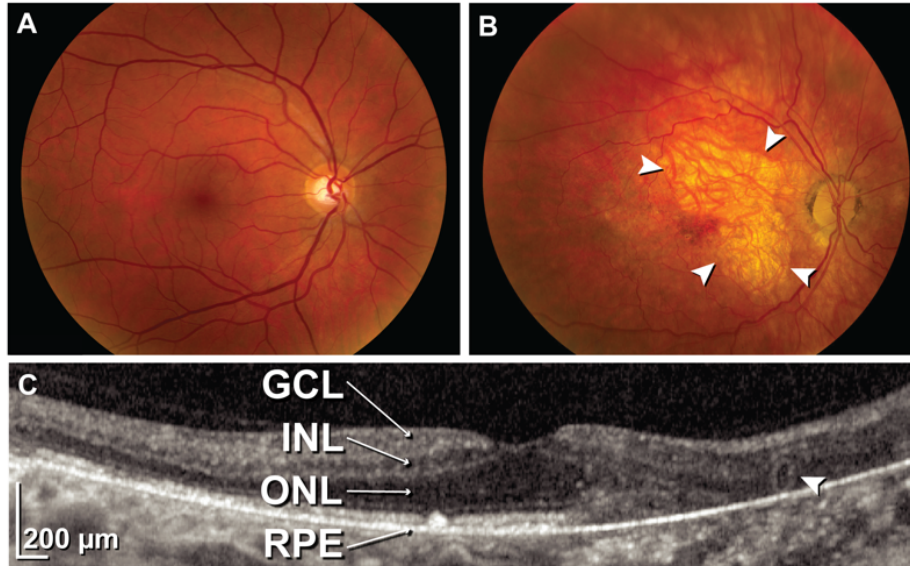

**Supplemental Figure 1. Macular retinopathy caused by the m.3243A>G variant. (A)** Color fundus photograph of the right eye of a healthy control patient with 20/20 acuity. **(B)** Color fundus photograph of the proband. Macular atrophy of the RPE and choriocapillaris typical of MELAS is appreciable (white arrowheads). **(C)** Optical coherence tomography (OCT) of the proband demonstrates outer retinal tubulations (white arrowhead) indicative of migration of cone photoreceptor cells following RPE cell death (GCL; ganglion cell layer, INL; inner nuclear layer, ONL; outer nuclear layer, RPE; retinal pigment epithelium/Bruch's complex).

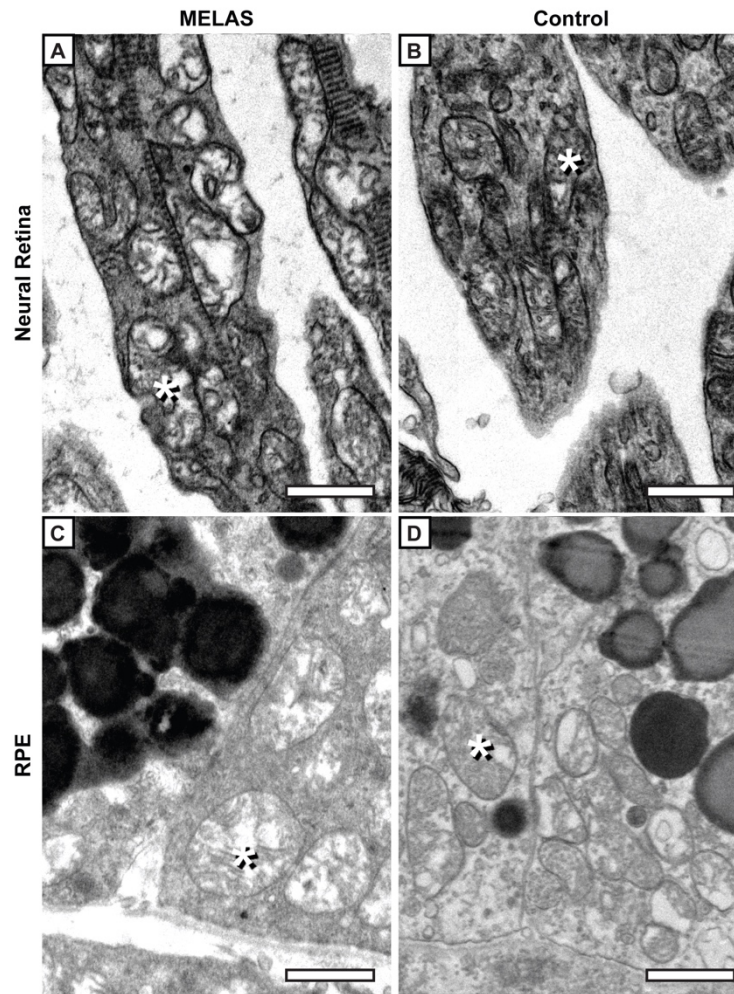

**Supplemental Figure 2. Mitochondria ultrastructure in MELAS neural retina and RPE. (A)** Transmission electron micrographs of photoreceptor cell inner segments from MELAS patient samples reveal abnormal mitochondrial structure compared to control tissue **(B)**. **(C)** Transmission electron micrograph of RPE cells from MELAS patient samples also show abnormal mitochondrial structure compared to control **(D)**. Mitochondria are indicated with asterisks. Scale bar represents 1 $\mu$ m.

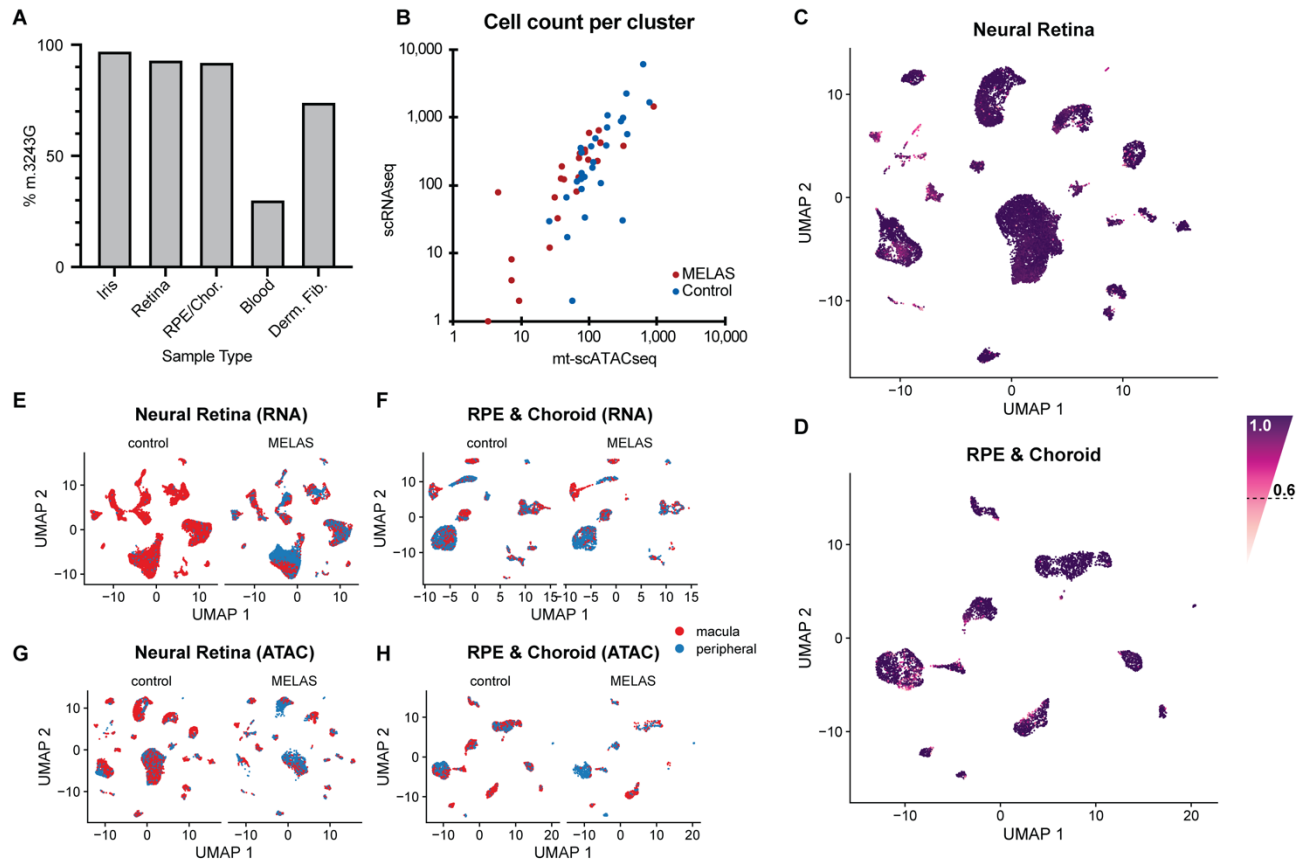

**Supplemental Figure 3. scRNAseq and mt-scATACseq of MELAS and control ocular cells.** (A) m.3243A>G heteroplasmy as measured by digital PCR in ocular and non-ocular cell types from the proband (MELAS 1). (B) High correlation in cell number per cluster as measured by scRNAseq and mt-scATACseq modalities across MELAS and control samples. Each dot represents one cell type in the control (blue) or MELAS (red) donor. (C) Two-dimensional UMAP embedding of neural retinal cells based on mt-scATACseq data from the proband and control donor. Cells are colored based on label transfer prediction score. (D) Two-dimensional UMAP embedding of RPE and choroidal cells based on mt-scATACseq data from the proband and control donor. Cells are colored based on label transfer prediction score. (E, F) Two-dimensional UMAP embedding of neural retinal and RPE/choroidal cells based on scRNAseq data. (G, H) Two-dimensional UMAP embedding of neural retinal and RPE/choroidal cells based on mt-scATACseq data. Cells in (E-H) are split by donor and colored based on region of sample.

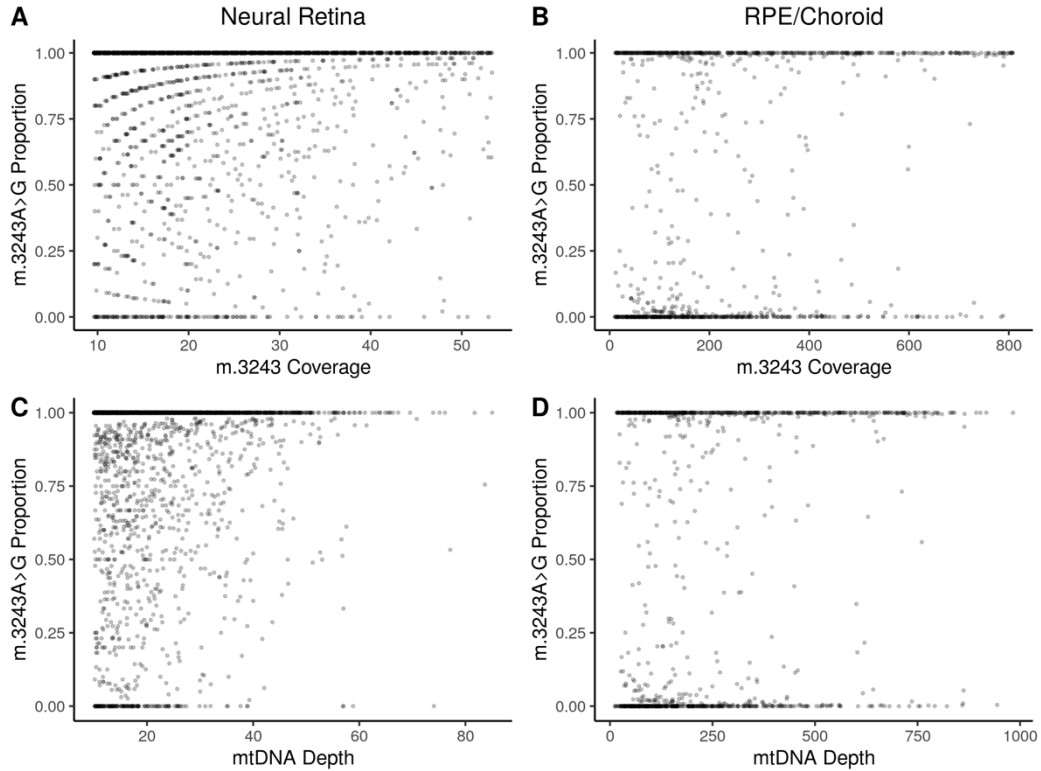

**Supplemental Figure 4. m.3243A>G heteroplasmy measurement by mt-scATACseq in the context of locus and genome coverage. (A, B)** Each cell from **Figure 3** is plotted with measured m.3243G proportion on the y-axis and mt-scATACseq coverage of the m.3243 locus on the x-axis. No correlation is observed; cells with both high and lower coverage of the m.3243G locus display a range of m.3243G proportions. **(C, D)** Cells from **Figure 3** are shown with m.3243G proportion plotted against average mtDNA sequencing depth. As in **A** and **B**, no correlation is observed, showing that neither sequencing depth nor m.3243 coverage by mt-scATACseq confounds measurement of m.3243A>G heteroplasmy.

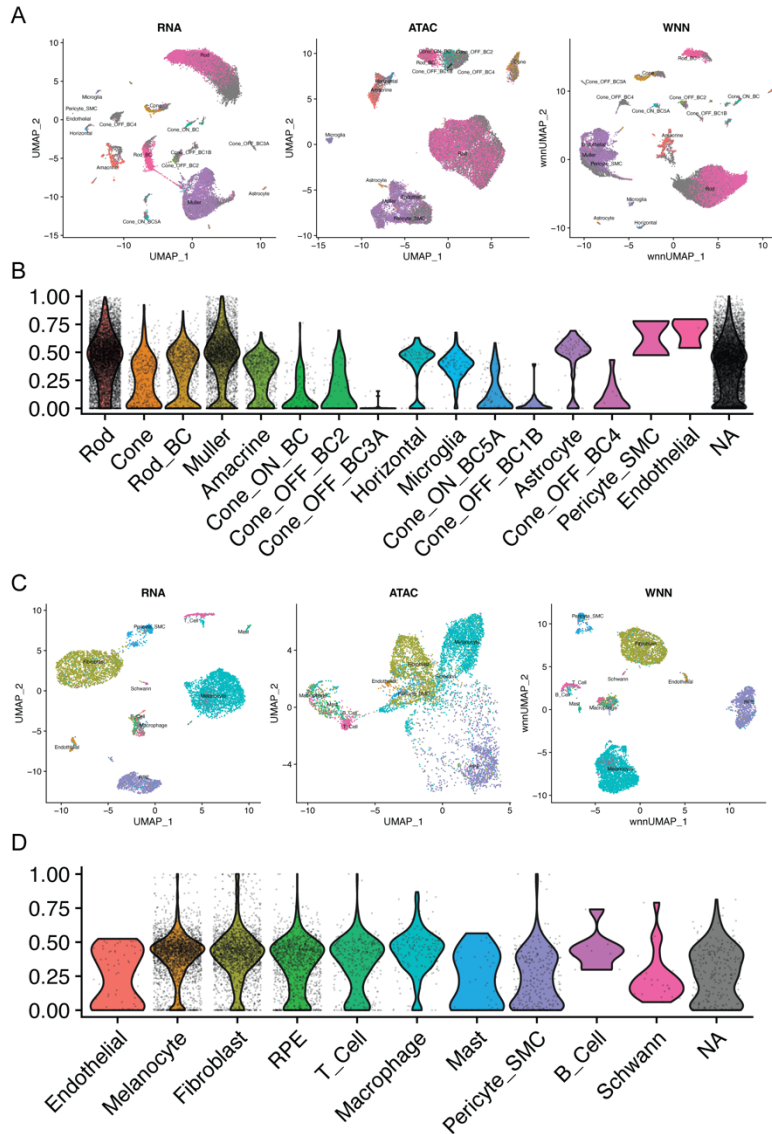

**Supplemental Figure 5. Integration of multimodal data from retinal and choroidal single cells.** Weighted nearest neighbor (WNN) analysis was used to combine sequencing modalities and drive dimensionality reduction and clustering. **(A)** Two-dimensional UMAP embedding of neural retinal cells based on scRNAseq modality, mt-scATACseq modality, and a weighted combination of scRNAseq and mt-scATACseq modalities. **(B)** Modality weighting in (A) per cell, shown grouped by cell type. **(C)** Two-dimensional UMAP embedding of choroidal and RPE cells based on scRNAseq modality, mt-scATACseq modality, and a weighted combination of scRNAseq and mt-scATACseq modalities. **(D)** Modality weighting in (C) per cell, shown grouped by cell type.
